# Supplementary material for: Effects of Cu(II) on the Adsorption Behaviors of Cr(III) and Cr(VI) onto Kaolin
Source: Hindawi journal article supplement (doi:10.1155/2016/3069754), 2016-01-01
Supplement: f1 [file 3069754.f1.docx]

Supporting Information for

**Effects of Cu(II) on the Adsorption behaviors of Cr(III) and Cr(VI) on Kaolin**

*Submit to Journal of Chemsitry*

Juanjuan Liu, 1 Xiaolong Wu, 1 Yandi Hu, 3 Chong Dai, 3 Qin Peng, 1 and Dongli Liang 1, 2

*1. College of Natural Resources and Environment, Northwest A&F University, Yangling, Shaanxi 712100, China；*

*2. Key Laboratory of Plant Nutrition and the Agri-environment in Northwest China, Ministry of Agriculture, Yangling, Shaanxi 712100, China*

*3. Department of Civil & Environmental Engineering, University of Houston, Houston, Texas 77004, United States*

* Corresponding author. Tel.: +86 2987082583; fax: +86 2987080050

E-mail addresses: dlliang@nwsuaf.edu.cn (D.L.Liang);

**Summary**

4 pages included two text (S1-S2) and two tables (S3)

**S1 The details of the three types of mechanisms in intra-particle diffusion model**

I) Film diffusion involves the movement of metal ions from aqueous phase through the hydrodynamic boundary layer film of the solid. These metal ions are mainly adsorbed on the boundary and surface adsorption sites of the minerals. The duration of this process can last from minutes to hours.

II) Pore diffusion is the transportation of metal ions into the pores between the mineral layers.

III) Intra-particle diffusion occurs when the metal ions move through the interior solid surface and are fixed on the intra-surface active sites of clay minerals. The third step is considered to be very rapid and therefore cannot be considered as the rate-controlling step [1, 2].

**S2 The effect of saturation indices in adsorption of Cr(III)**

With the further increasing of pH (pH > 4.0), the single and binary solutions were saturated with respect to Cr(OH)3 (aq) (SI > 0) ([3], and the following reactions (1) can occur:

Cr (OH)2+ +H2O Cr(OH)3 (am) + H+ (1)

The saturation indices (SI) of solutions with respect to Cr(OH)3 (aq) was calculated and shown in Fig.5(b). In general form, [4] have proposed the following empirical equation (2) for predicting mineral precipitation rate:

(2)

Where, *A* is the reactive surface area of the minerals*; k* is either the growth or dissolution rate constant, and *m* and *n* are two adjustable positive numbers. *Ω* is the supersaturation ratio of solution with respect to mineral. Based on equation (2), higher supersaturation (*Ω*) correlates with higher precipitation rate. As shown in Fig. 5(b), with the increasing of pH, the values of SI increased. The increased SI can enhance the precipitation rate of Cr(OH)3 (aq). Therefore, at high pH (pH > 4.0), the precipitate of Cr-bearing minerals was the dominant mechanisms controlling Cr(III) onto kaolin in both single and binary solutions.

**S3. The comparison of other low-cost adsorbents for Cr(III) and Cr(VI) removal in absence and presence of other heavy metals, values of the adsorption capacity and optimum pH of other adsorbents from the literature are given in Table S1 and Table S2.**

TABLE S1: Comparison of Cr adsorption capacity (*q*m) among different low-cost adsorbents

| Adsorbate | | *q*m (mg∙g–1) | | Optimum pH | References |
| --- | --- | --- | --- | --- | --- |
| **Cr(III)** | Kaolin (China) | | 0.535 | 7.0 | This study |
|  | Illite | | 0.728 | 5.0 | [5] |
|  | Bentonite | | 0.837 | 3.0 | [6] |
|  | Celtek clay | | 3.92 | 6.0 | [7] |
|  | Tunisia clay | | 35.70 | 3.5 | [8] |
|  | chitosan/attapulgite composites | | 15.0 | 5.0 | [9] |
|  | Organo Bentonite | | 18.72 | 6.0 | [10] |
|  | Coir pith | | 11.56 | 3.3 | [11] |
| **Cr(VI)** | Kaolin (China) | | 0.908 | 5.0 | This study |
|  | Activated clay | | 0.912 | 2.0 | [12] |
|  | Akadama clay | | 4.29 | 2.0 | [13] |
|  | Acid activated kaolinite | | 9.78 | 7.0 | [14] |
|  | Dolomite | | 10.1 | 2.0 | [1] |
|  | Organo Bentonite | | 25.48 | 6.0 | [10] |
|  | Nanoscale zero-valent iron synthesized kaolin | | 33.39 | 4.0 | [15] |
|  | charcoals | | 205 | 1.0 | [16] |
|  | Coconut charcoal | | 2.25 | 5.0 | [17] |

TABLE S2: Comparison of Cr adsorption capacity (*q*m) among different low-cost adsorbents in binary solution

| Adsorbate | | *q*m (mg∙g–1) | | Optimum pH | Existed metal | References |
| --- | --- | --- | --- | --- | --- | --- |
| **Cr(III)** | Kaolin (China) | | 0.73 | 6.0 | Cu(II) | This study |
|  | Thai Kaolin | | 3.09 | 5.0 | Cu(II) | [5] |
|  | Na-bentonite | | 9.96 | 7.0 | Cu(II) | [18] |
|  | Illite | | 2.76 | 5.0 | Zn(II) | [5] |
|  | Na-bentonite | | 6.90 | 7.0 | Na(I) | [18] |
|  | Tunisia clay | | 94.0 | 3.5 | Cd(II) | [8] |
| **Cr(VI)** | Kaolin (China) | | 0.38 | 2.0 | Cu(II) | This study |
|  | mesoporous silica | | 3.31 | 5.0 | Cu(II) | [19] |
|  | coconut charcoal | | 1.95 | 5.0 | As(III) | [17] |
|  | coconut charcoal | | 2.10 | 5.0 | Ni(II) | [17] |

**References**

[1] A.B. Albadarin, C. Mangwandi, A.a.H. Al-Muhtaseb, G.M. Walker, S.J. Allen, and M.N.M. Ahmad, "Kinetic and thermodynamics of chromium ions adsorption onto low-cost dolomite adsorbent," *Chemical Engineering Journal*, vol. 179, no., pp. 193-202, 2012.

[2] M. Gan, S.J. Sun, Z.H. Zheng, H.J. Tang, J.R. Sheng, J.Y. Zhu, and X.X. Liu, "Adsorption of Cr(VI) and Cu(II) by AlPO4 modified biosynthetic Schwertmannite," *Applied Surface Science*, vol. 356, no. 1, pp. 986-997, 2015.

[3] T. Chen, Z.Y. Zhou, S. Xu, H.T. Wang, and W.J. Lu, "Adsorption behavior comparison of trivalent and hexavalent chromium on biochar derived from municipal sludge," *Bioresource Technology*, vol. 190, no. 1, pp. 388-394, 2015.

[4] C.I. Steefel, and P. Van Cappellen, "A new kinetic approach to modeling water-rock interaction: The role of nucleation, precursors, and Ostwald ripening," *Geochimica et Cosmochimica Acta*, vol. 54, no. 10, pp. 2657-2677, 1990.

[5] V. Chantawong, N. Harvey, and V. Bashkin, "Comparison of heavy metal adsorptions by Thai kaolin and ballclay," *Water Air and Soil Pollution*, vol. 148, no. 1-4, pp. 111-125, 2003.

[6] S. Tahir, and R. Naseem, "Removal of Cr(III) from tannery wastewater by adsorption onto bentonite clay," *Separation and Purification Technology*, vol. 53, no. 3, pp. 312-321, 2007.

[7] A. Sarı, M. Tuzen, and M. Soylak, "Adsorption of Pb(II) and Cr(III) from aqueous solution on Celtek clay," *Journal of Hazardous Materials*, vol. 144, no. 1, pp. 41-46, 2007.

[8] I. Ghorbel-Abid, K. Galai, and M. Trabelsi-Ayadi, "Retention of chromium (III) and cadmium (II) from aqueous solution by illitic clay as a low-cost adsorbent," *Desalination*, vol. 256, no. 1-3, pp. 190-195, 2010.

[9] X. Zou, J. Pan, H. Ou, X. Wang, W. Guan, C. Li, Y. Yan, and Y. Duan, "Adsorptive removal of Cr(III) and Fe(III) from aqueous solution by chitosan/attapulgite composites: Equilibrium, thermodynamics and kinetics," *Chemical Engineering Journal*, vol. 167, no. 1, pp. 112-121, 2011.

[10] B. Sarkar, R. Naidu, and M. Megharaj, "Simultaneous Adsorption of Tri- and Hexavalent Chromium by Organoclay Mixtures," *Water, Air, & Soil Pollution*, vol. 224, no. 12, pp. 1-10, 2013.

[11] H. Parab, S. Joshi, N. Shenoy, A. Lali, U.S. Sarma, and M. Sudersanan, "Determination of kinetic and equilibrium parameters of the batch adsorption of Co(II), Cr(III) and Ni(II) onto coir pith," *Process Biochemistry*, vol. 41, no. 3, pp. 609-615, 2006.

[12] C.H. Weng, Y.C. Sharma, and S.H. Chu, "Adsorption of Cr(VI) from aqueous solutions," *Journal of Hazardous Materials*, vol. 155, no. 1-2, pp. 65-75, 2008.

[13] Y.X. Zhao, S.J. Yang, D.H. Ding, J. Chen, Y.N. Yang, Z.F. Lei, C.P. Feng, and Z.Y. Zhang, "Effective adsorption of Cr (VI) from aqueous solution using natural Akadama clay," *Journal of Colloid and Interface Science*, vol. 395, no., pp. 198-204, 2013.

[14] K.G. Bhattacharyya, and S. Sen Gupta, "Adsorption of chromium (VI) from water by clays," *Industrial & Engineering Chemistry Research*, vol. 45, no. 21, pp. 7232-7240, 2006.

[15] C. Wang, Z. Xu, G. Ding, X.X. Wang, M.J. Zhao, S.S.H. Ho, and Y.C. Li, "Comprehensive study on the removal of chromate from aqueous solution by synthesized kaolin supported nanoscale zero-valent iron," *Desalination Water Treatment*, vol. 57, no. 11, pp. 1-14, 2015.

[16] M. Varga, M. Takács, G. Záray, and I. Varga, "Comparative study of sorption kinetics and equilibrium of chromium(VI) on charcoals prepared from different low-cost materials," *Microchemical Journal*, vol. 107, no., pp. 25-30, 2013.

[17] Y.H. Wu, Y.J. Wen, J.X. Zhou, J.L. Cao, Y.P. Jin, and Y.Y. Wu, "Comparative and competitive adsorption of Cr(VI), As(III), and Ni(II) onto coconut charcoal," *Environmental Science and Pollution Research*, vol. 20, no. 4, pp. 1-10, 2013.

[18] Y.G. Chen, Y. He, W.M. Ye, and L.Y. Jia, "Competitive adsorption characteristics of Na (I)/Cr (III) and Cu (II)/Cr (III) on GMZ bentonite in their binary solution," *Journal of Industrial and Engineering Chemistry*, vol. 26, no., pp. 335-339, 2015.

[19] Q.P. Wu, R.R. You, Q.F. Lv, Y.L. Xu, W.J. You, and Y. Yu, "Efficient simultaneous removal of Cu(II) and Cr2O72− from aqueous solution by a renewable amphoteric functionalized mesoporous silica," *Chemical Engineering Journal*, vol. 281, no., pp. 491-501, 2015.
